# Supplementary material for: Characterization of Immune-Based Molecular Subtypes and Prognostic Model in Prostate Adenocarcinoma
Source: MDPI journal article supplement (doi:10.3390/genes13061087), 2022-06-18
Supplement: s1 [file s1]

**Table S1.** Comparison analysis of some clinical characteristics in TCGA PRAD cohort.

| Parameter     |           | Immune subtype (n, %) |                       | P value | FDR    |
|---------------|-----------|-----------------------|-----------------------|---------|--------|
|               |           | C1 subtype<br>(n=195) | C2 subtype<br>(n=269) |         |        |
| Age           | ≤65 years | 59 (30.26)            | 74 (27.51)            | 0.5298  | 0.6055 |
|               | >65 years | 136 (69.74)           | 149 (55.39)           |         |        |
| clinical_M    | M0-1      | 177 (90.77)           | 251 (93.31)           | 0.3798  | 0.5064 |
|               | missing   | 18 (9.23)             | 18 (6.69)             |         |        |
| clinical_T    | T1        | 65 (33.33)            | 95 (35.32)            | 0.3144  | 0.5030 |
|               | T2        | 69 (35.39)            | 97 (36.06)            |         |        |
|               | T3-T4     | 28 (14.36)            | 24 (8.92)             |         |        |
|               | NA        | 33 (16.92)            | 53 (19.70)            |         |        |
| pathologic_N  | N0        | 122 (62.56)           | 201 (74.72)           | 0.0179  | 0.1432 |
|               | N1        | 38 (19.49)            | 37 (13.75)            |         |        |
|               | missing   | 35 (17.95)            | 31 (11.52)            |         |        |
| pathologic_T  | T2        | 67 (32.36)            | 108 (40.15)           | 0.1695  | 0.3506 |
|               | T3        | 124 (63.59)           | 150 (55.76)           |         |        |
|               | T4        | 4 (2.05)              | 7 (2.60)              |         |        |
|               | missing   | 0 (0)                 | 4 (1.49)              |         |        |
| gleason_score | 6         | 20 (10.26)            | 23 (8.55)             | 0.0394  | 0.1576 |
|               | 7         | 84 (43.08)            | 148 (55.02)           |         |        |
|               | 8-10      | 91 (46.67)            | 98 (36.43)            |         |        |
| psa_value     | <5.0      | 161 (94.15)           | 230 (95.04)           | 0.9382  | 0.9382 |
|               | 5.0-9.9   | 3 (1.75)              | 4 (1.65)              |         |        |
|               | ≥10       | 7 (4.09)              | 8 (3.31)              |         |        |
| vital_status  | Living    | 189(96.92)            | 266(98.88)            | 0.1753  | 0.3506 |
|               | Dead      | 6(3.08)               | 3(1.12)               |         |        |

M, metastasis; T, tumor, N, lymph node. P values were obtained by Fisher's exact test, and FDR values were correctly by the Benjamini-Hochberg method.
