# Supplementary material for: Characterization of Immune-Based Molecular Subtypes and Prognostic Model in Prostate Adenocarcinoma
Source: MDPI journal article supplement (doi:10.3390/genes13061087), 2022-06-18

consensus matrix k=3

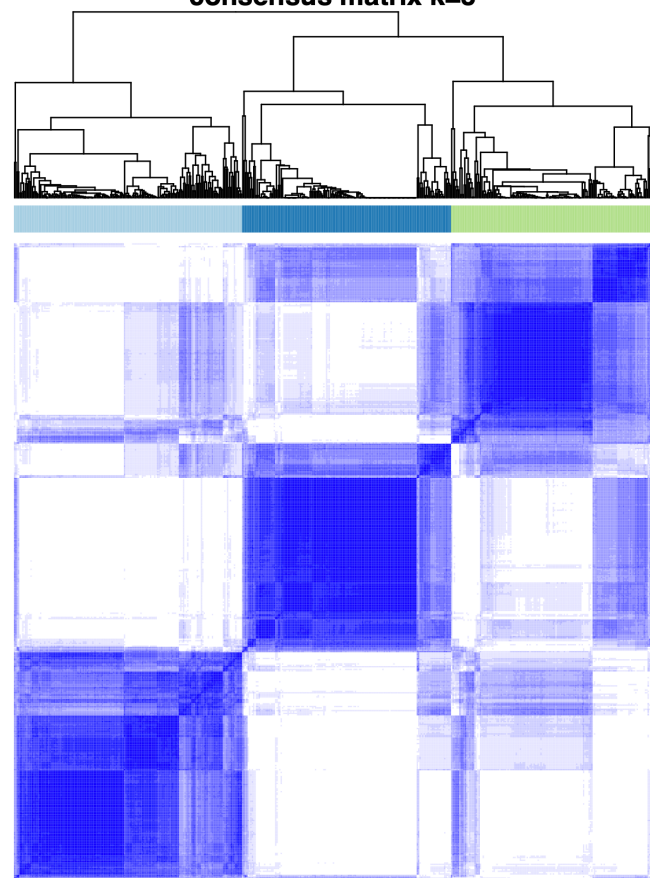

consensus matrix k=4

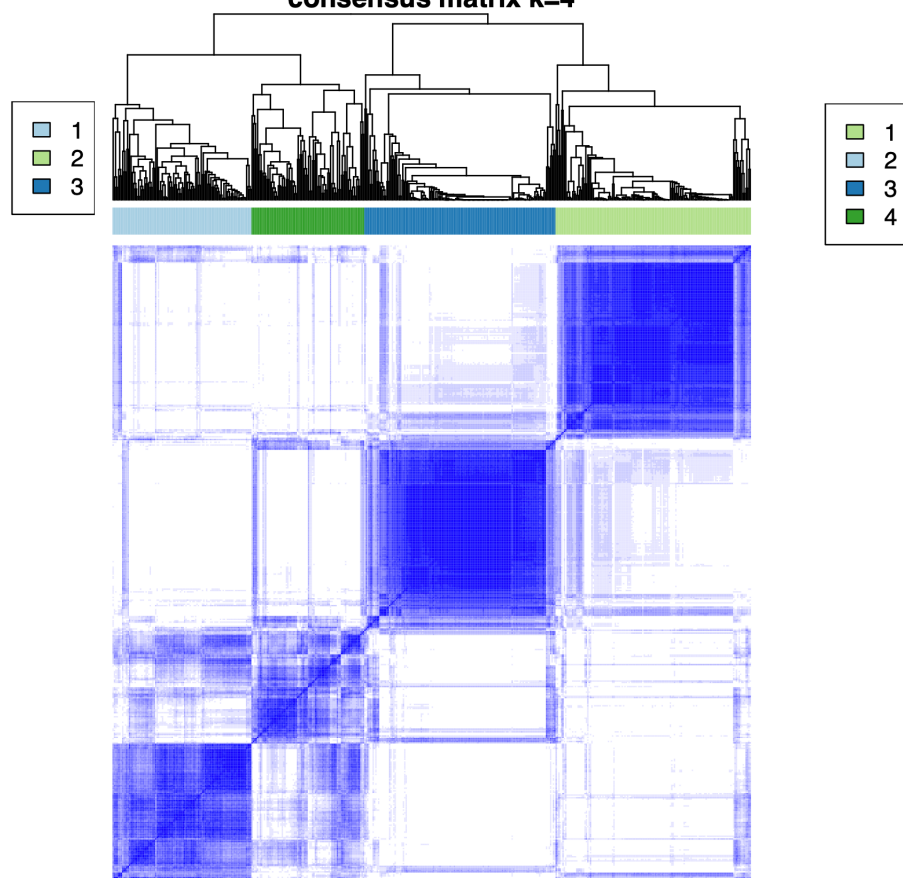

consensus matrix k=5

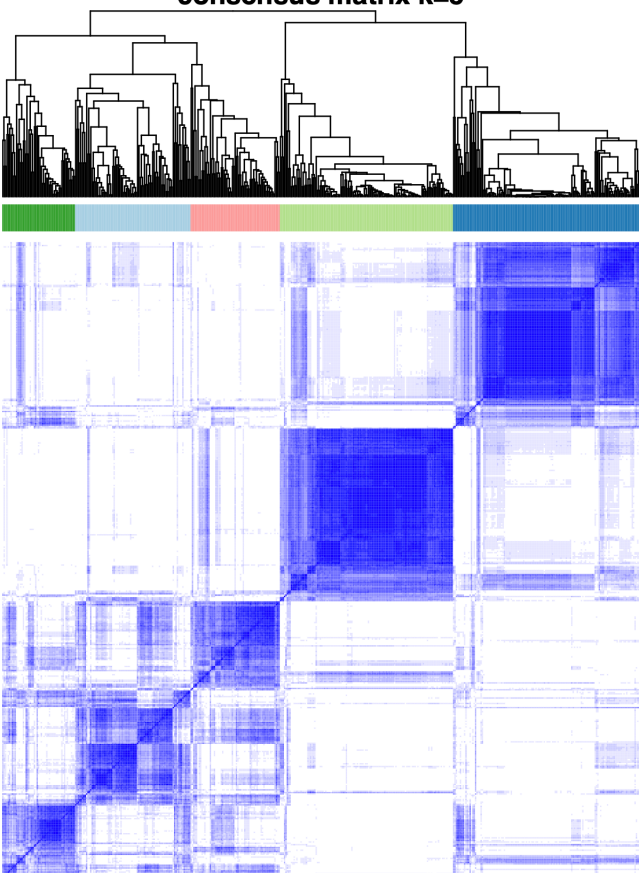

consensus matrix k=6

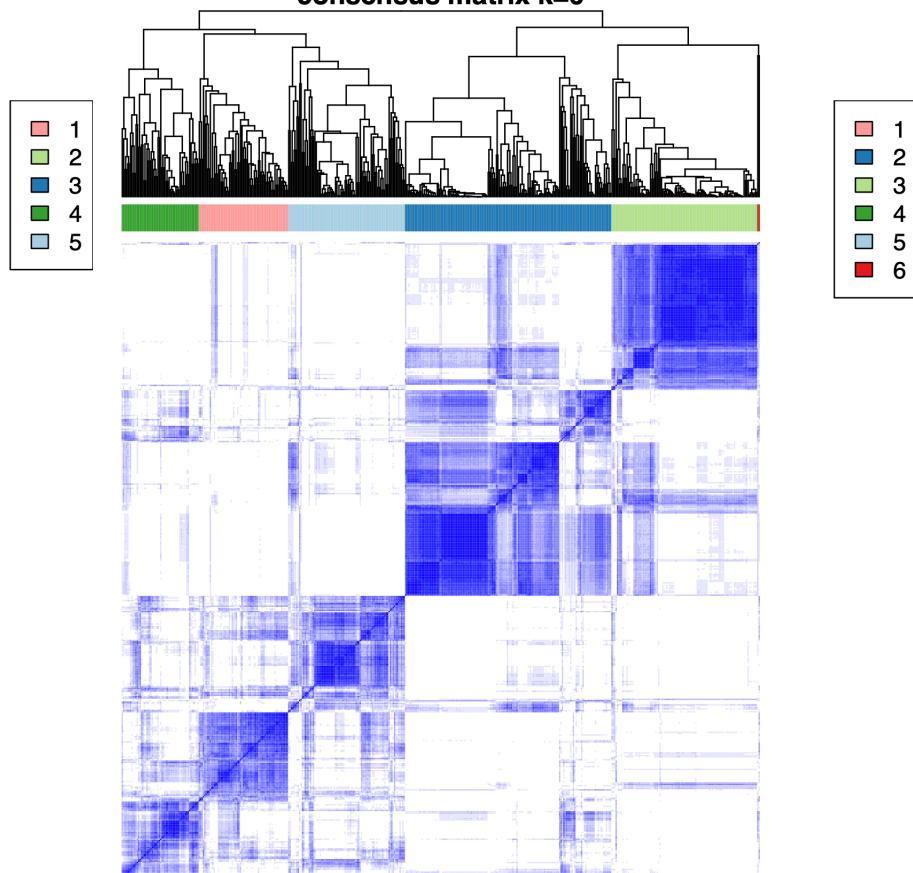

Delta area

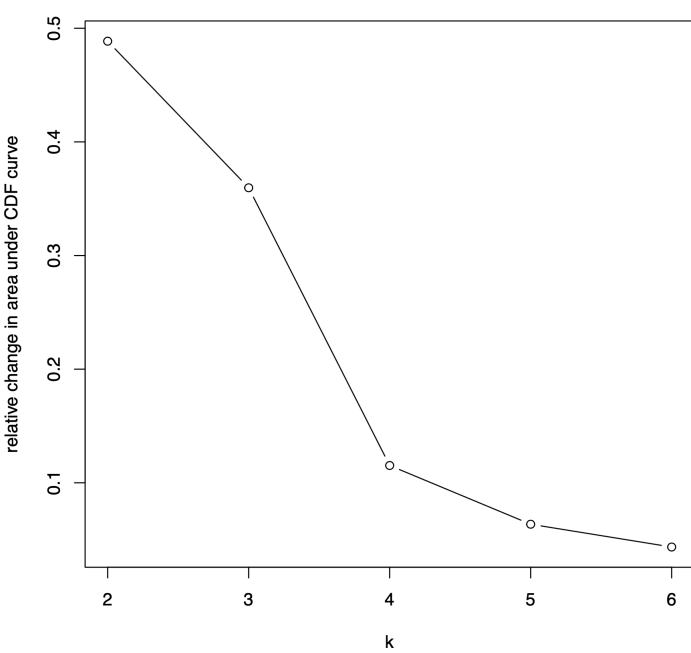

tracking plot

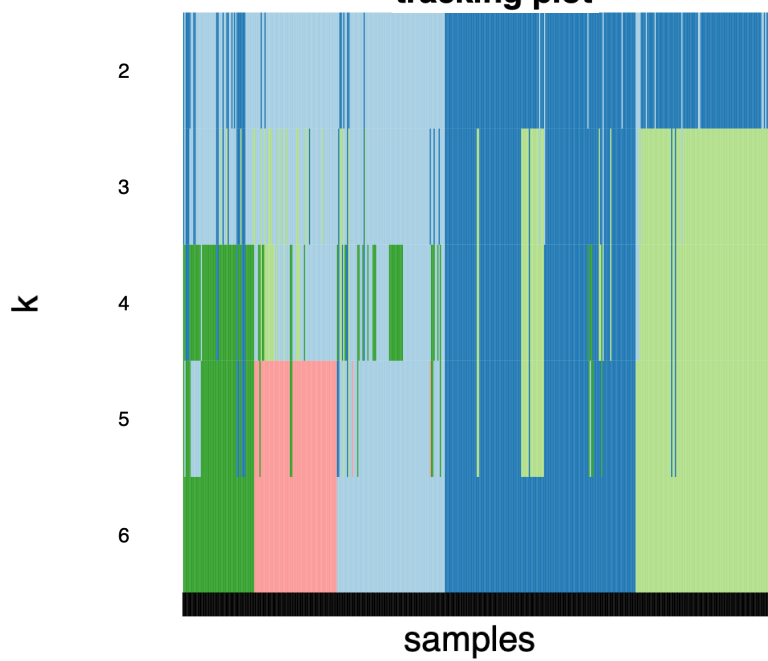

Supplement: s1 [file s1]
