# Supplementary figures and images for: Characterization of Immune-Based Molecular Subtypes and Prognostic Model in Prostate Adenocarcinoma
Source: MDPI journal article supplement (doi:10.3390/genes13061087), 2022-06-18

item-consensus k=3

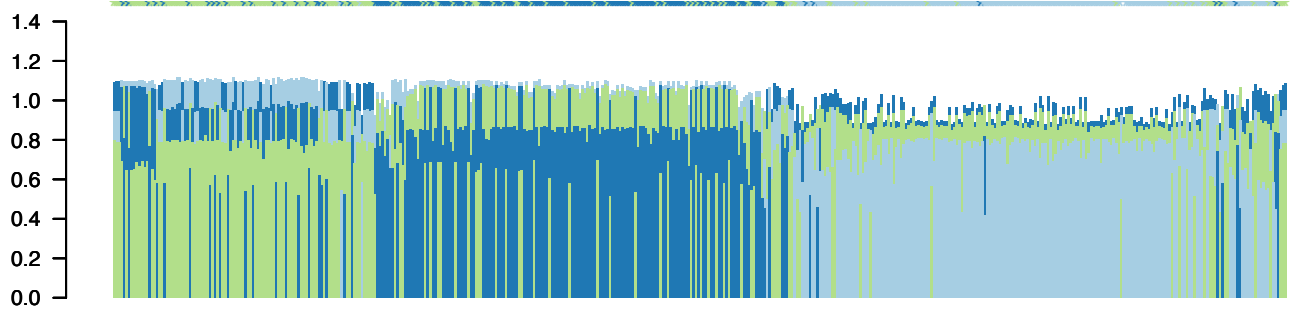

item-consensus k=4

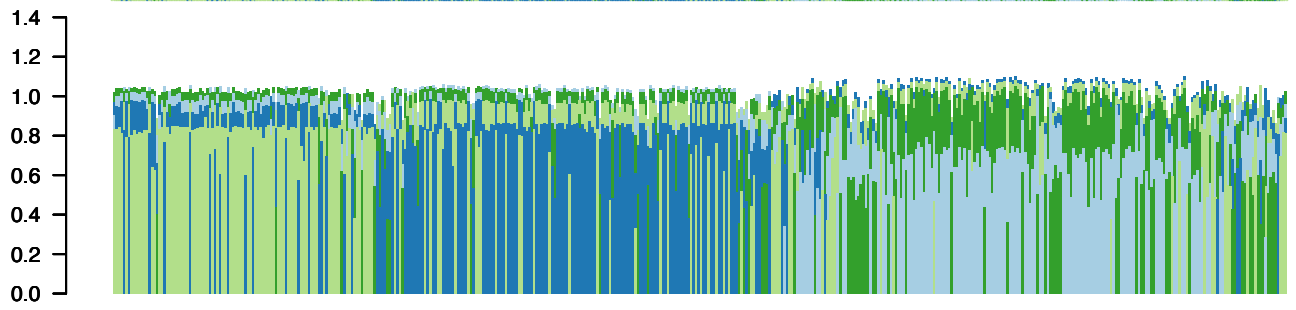

item-consensus k=5

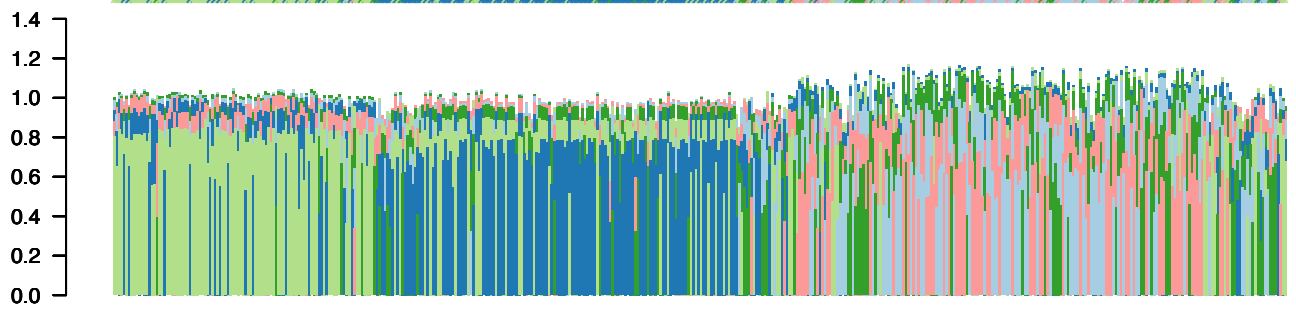

item-consensus k=6

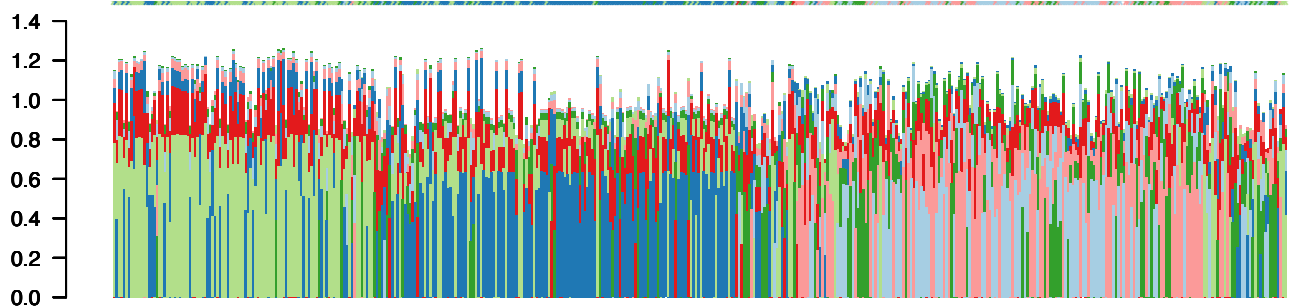

cluster-consensus

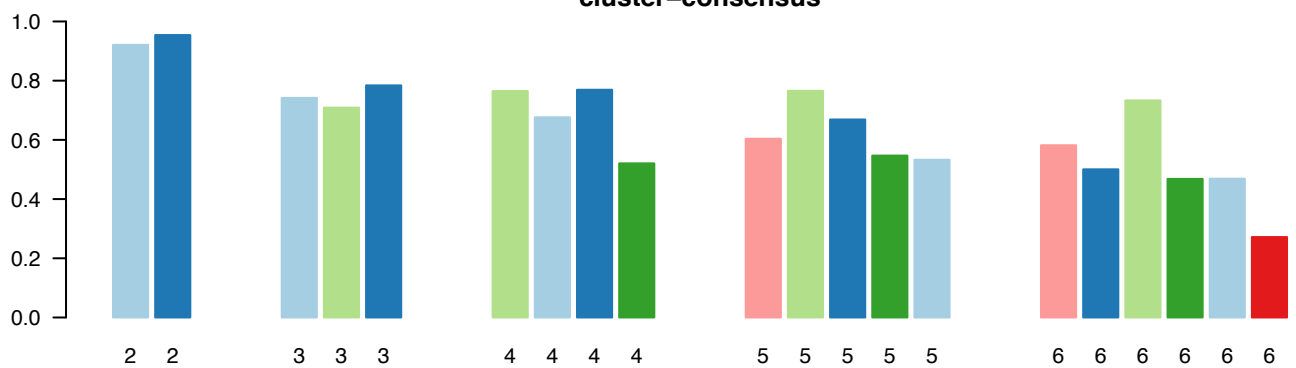

Supplement: s1 [file s1]
